# Supplementary material for: Nitrate reductase-dependent nitric oxide is crucial for multi-walled carbon nanotube-induced plant tolerance against salinity
Source: Royal Society of Chemistry journal article supplement (doi:10.1039/c8nr10514f), 2019-01-01
Supplement: c8nr10514f1.pdf [file c8nr10514f1.pdf]

1 **Supplementary Table 1** The sequences of primers for qPCR used in rapeseed

| Primer name    | Accession number | Sequence (5'→3')         |
|----------------|------------------|--------------------------|
| <i>BnActin</i> | LOC106418315     | F: CTGACCGTATGAGCAAAG    |
|                |                  | R: CCACCGAACCAGAAGGCAGA  |
| <i>BnGAPDH</i> | LOC106382350     | F: TGTGCCAATCTACGAGGGTTT |
|                |                  | R: TTTCCCGCTCTGCTGTTGT   |

*BnAPX*            LOC106420215

*BnCu/ZnSOD* LOC106426158

F: CCAACGTCCACGCTGATAAGA

R: ACAGGTCCTATAGCCGTTGCA

*BnMnSOD* LOC106452722

|               |              |                                                                                |
|---------------|--------------|--------------------------------------------------------------------------------|
| <i>BnSOSI</i> | LOC106418114 | F: CCAGAGGTACTTAATGGCCAAG<br>R: GTGGCCTTGACTGAACAATGTA                         |
| <i>BnNHX1</i> | LOC106367780 | F: CAATGCAGGGTTTCAAGTA<br>R: AGTCAAAGGTCCCAATGTC<br>F: ATACAAGCTGCTTCAAACCTTCG |
| <i>BnKT1</i>  | LOC10644670  |                                                                                |



4 **Supplementary Table 2** The sequences of primers for qPCR used in Arabidopsis

| Primer name      | Accession number | Sequence (5'→3')                                           |
|------------------|------------------|------------------------------------------------------------|
| <i>AtActin 2</i> | At3g18780        | F: ACAACCGGTATTGTGCTGGA<br>R: GAAGACGGAGGATGGCATGA         |
| <i>AtGAPDH</i>   | At1g13440        | F: TTGGTGACAACAGGTCAAGCA<br>R: AAAGTTGTCGCTCAATGCAATC      |
| <i>AtAPX1</i>    | At1g07890        | F: CTCTGGGACGATGCCACAAG<br>R: CTCGACCAAAGGACGGAAAA         |
| <i>AtAPX2</i>    | At3g09640        | F: GTTCAGGATTCGAGGGTGC<br>R: GAAGAGCCTTGTCGGTTGGT          |
| <i>AtFSD1</i>    | At495100         | F: AACCAGGTGGTGGAGGAA<br>R: GTAAGCAATGGGAAAGAGCC           |
| <i>AtCAT1</i>    | At1g20630        | F: TTCCCTGTATTCTTCGTCCG<br>R: GCCTTCCATGTGCCTGTAGT         |
| <i>AtSOS1</i>    | At2g01980        | F: TGCTTGATGAGGGCAGAATA<br>R: ACTTGCGTGGGACAACCTTA         |
| <i>AtSOS2</i>    | At5g35410        | F: TAGCGGAGAATGTAGAGAGAAAT<br>R: TGCTGTCGCCTGTCAAATAG      |
| <i>AtSOS3</i>    | At5g24270        | F: TGATTGAAGTAATGGTGGATAAGGC<br>R: AGTCATGTTCTTGATGAGCGATG |
| <i>AtNHX1</i>    | At5g27150        | F: AAGAGCTTGCCAGAAATTGATG<br>R: CGTCTTCCAAATCGAACTCATC     |
| <i>AtKT1</i>     | At2g26650        | F: CTACCTGTTTCGAGGAGTATCC<br>R: CACAGTAAACAGTTGTGGTCTG     |

7 **Fig. S1**

8

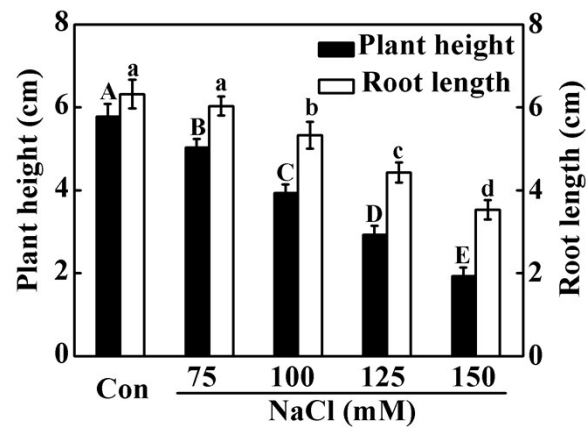

9 **Fig. S1** Plant growth inhibition upon NaCl stress in a dose-dependent fashion. Two-  
10 day-old rapeseed seedlings were transferred to the indicated concentrations of NaCl  
11 for 5 d. Afterwards, the plant height (left) and root length (right) were respectively  
12 measured. The sample without chemicals was the control (Con). Values are means  $\pm$   
13 SE of three independent experiments with three replicates for each. Bars with  
14 different letters are significant different at  $P < 0.05$  according to Duncan's multiple  
15 range test.

17 **Fig. S2**

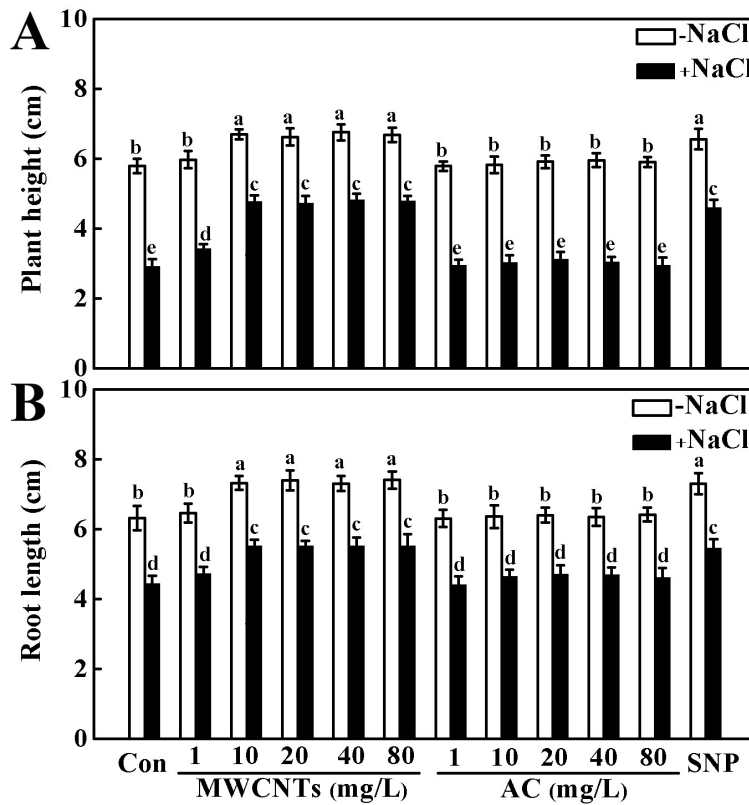

18 **Fig. S2** NaCl stress-triggered plant growth inhibition was alleviated by MWCNTs.  
 19 Two-day-old rapeseed seedlings were treated with the indicated concentrations of  
 20 MWCNTs or active carbon (AC), or 10  $\mu$ M SNP, in the absence or the presence of  
 21 125 mM NaCl for 5 d. Afterwards, the plant height (A) and root length (B) were  
 22 respectively measured. The sample without chemicals was the control (Con). Values  
 23 are means  $\pm$  SE of three independent experiments with three replicates for each. Bars  
 24 with different letters are significant different at  $P < 0.05$  according to Duncan's  
 25 multiple range test.

27 **Fig. S3**

28

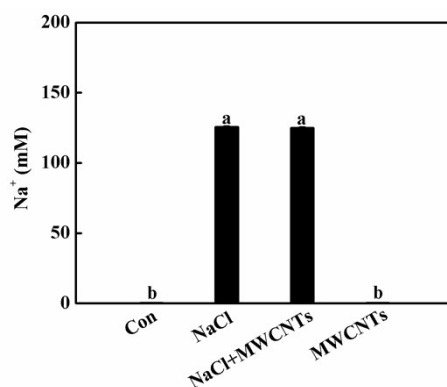

29 **Fig. S3** MWCNT did not absorb Na ion *in vitro*. After the mixture with 20 mg/L  
30 MWCNTs and 125 mM NaCl, simultaneously or separately, for 48 h followed by  
31 filtration, Na content was detected by ICP-OES. Deionized water alone was regarded  
32 as control (Con). Bars with different letters are significant different at  $P < 0.05$   
33 according to Duncan' multiple range test.



35 **Fig. S4**

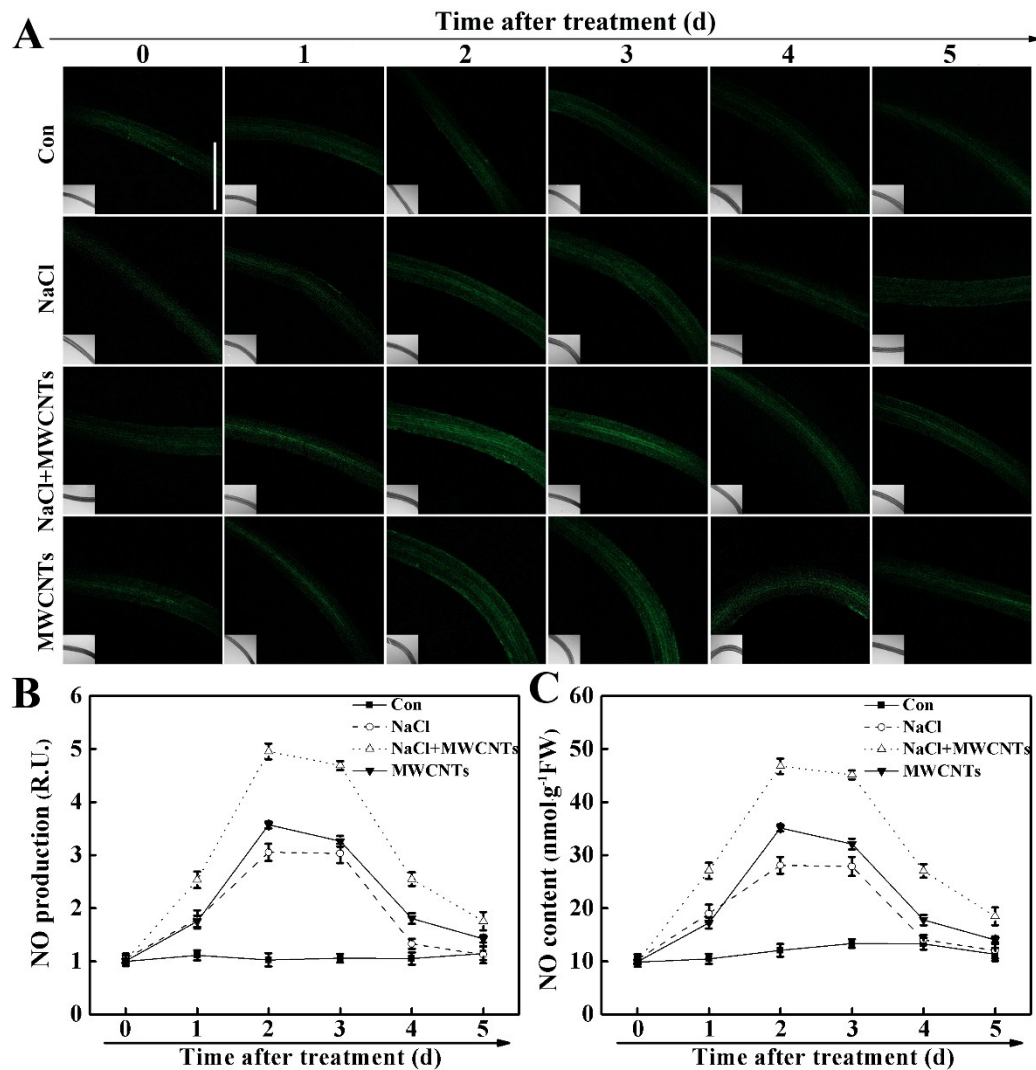

36 **Fig. S4** MWCNTs-induced NO production. Two-day-old rapeseed seedlings were  
 37 treated with 125 mM NaCl or 20 mg/L MWCNTs, alone or the combination. The  
 38 sample without chemicals was the control (Con). Afterwards, the time-course analysis  
 39 of NO contents (A; determined by laser scanning confocal microscopy, and  
 40 corresponding fluorescence densities were shown in B; C; determined by visible  
 41 spectrophotography) in root tissues were detected. Bar: 1 mm. R.U., relative units.  
 42 Values are means  $\pm$  SE.

43
